# Supplementary material for: Allergic sensitization to Mal d 1 without detectable specific serum IgE
Source: PubMed Central journal article supplement (PMC10107674; doi:10.1111/pai.13891), 2022-12-07

# Study Population

25 Bet v 1 allergic patients

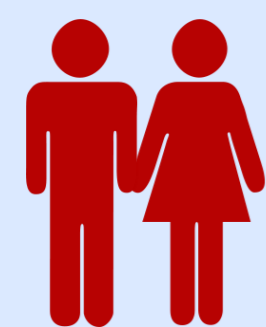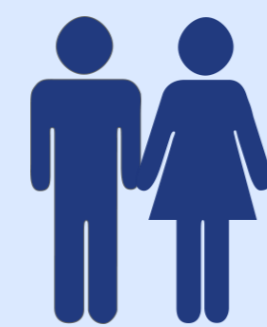

**GROUP 1**  
**With**  
**OAS to apple**  
**N=13**  
 Age, years M±SD  
 29.15±12.44  
 9 males,  
 4 females

**GROUP 2**  
**Without**  
**OAS to apple**  
**N=12**  
 Age, years M±SD  
 36.33±14.9  
 7 males,  
 5 females

# Key finding

2 of 25 patients

|             | Bet v 1  | Mal d 1         |
|-------------|----------|-----------------|
| <b>slgE</b> | positive | <b>negative</b> |
| <b>BAT</b>  | positive | positive        |
| <b>SPT</b>  | positive | positive        |

# Testing

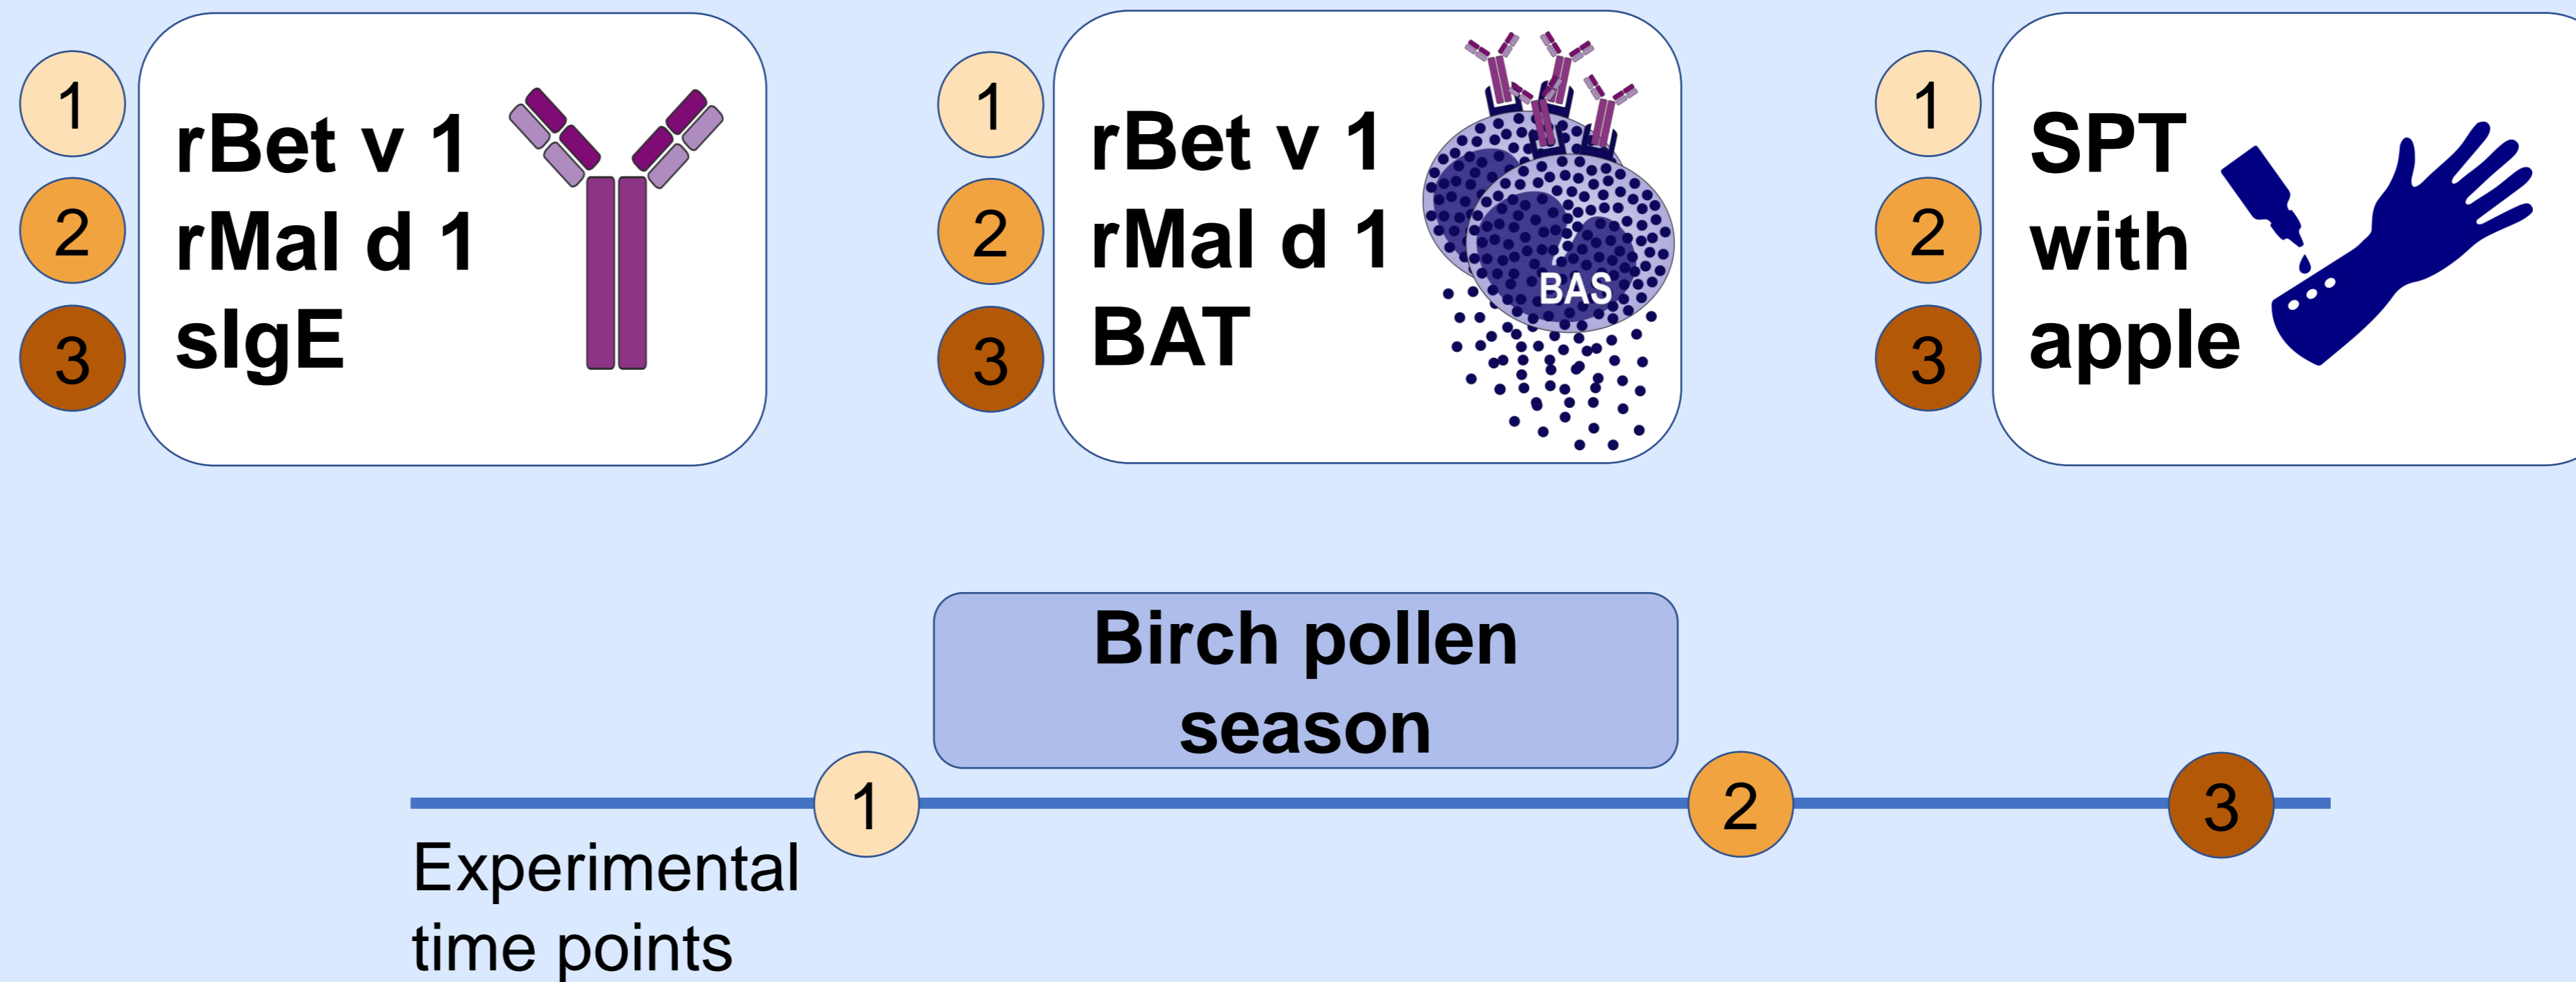

# Explanation

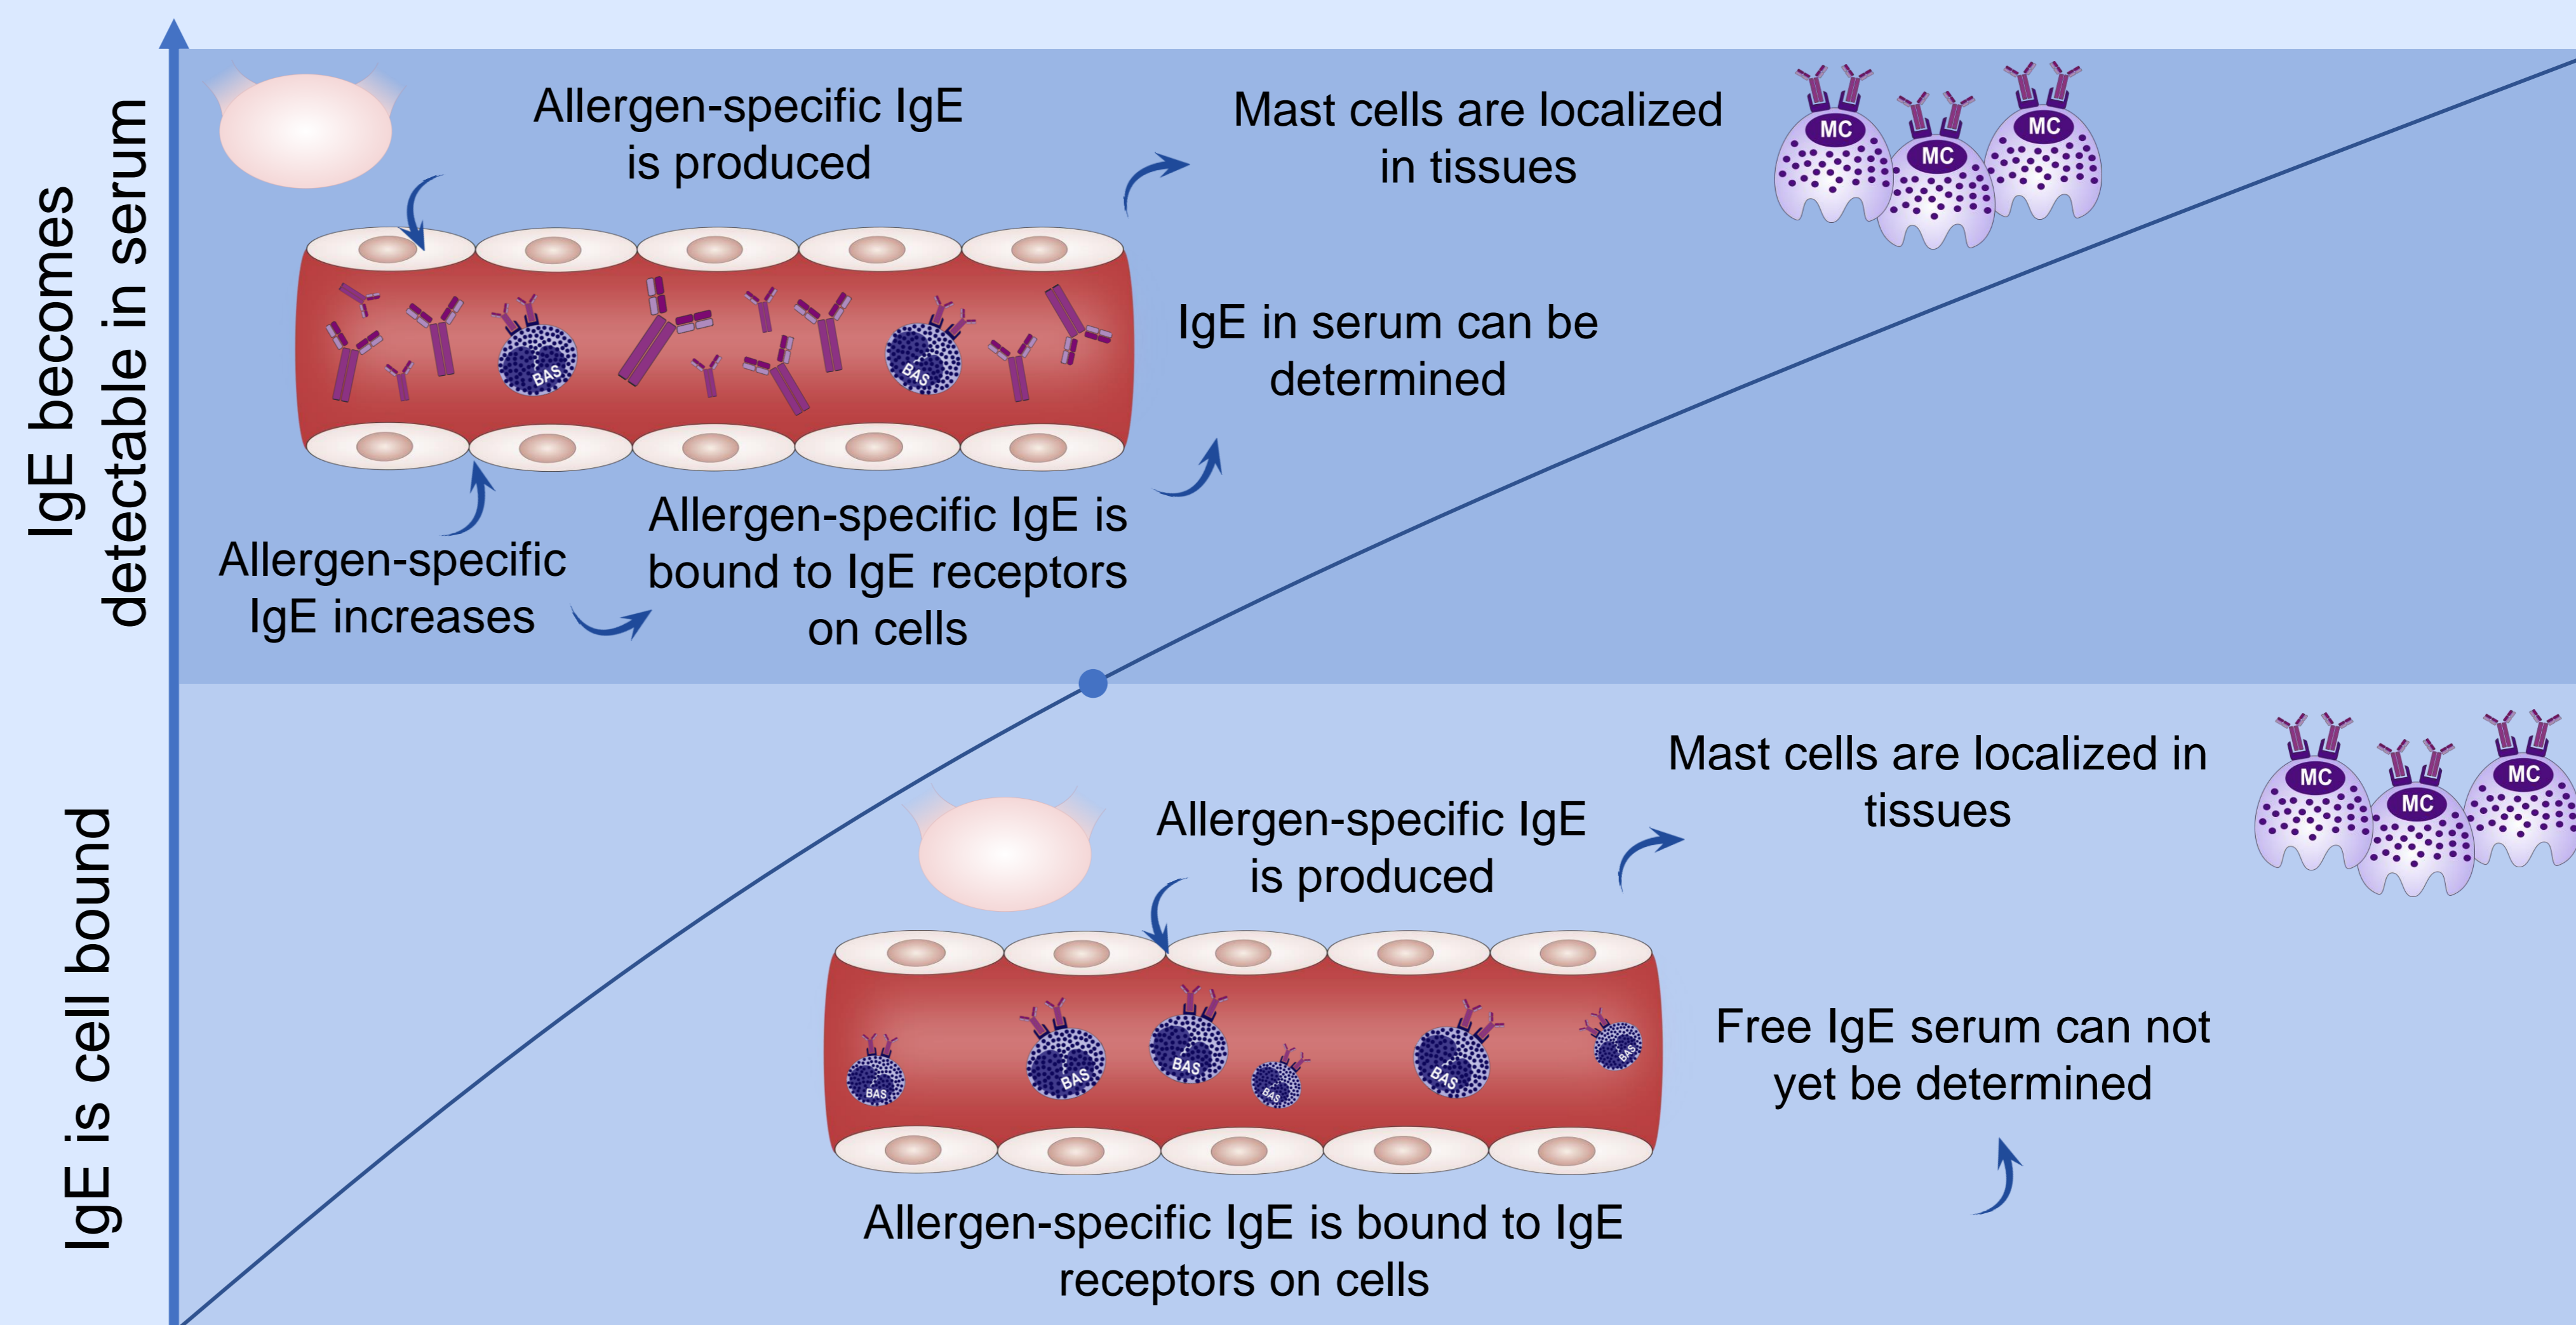

Supplement: PAI-33-0-s002.pdf [file PAI-33-0-s002.pdf]
